# Supplementary material for: Synthesis of discrete and dispersible hollow mesoporous silica nanoparticles with tailored shell thickness for controlled drug release
Source: Royal Society of Chemistry journal article supplement (doi:10.1039/c2jm31821k), 2012-01-01
Supplement: c2jm31821k.pdf [file c2jm31821k.pdf]

## Supporting Information

# Synthesis of Discrete and Dispersible Hollow Mesoporous Silica Nanoparticles with Tailored Shell Thickness for Controlled Drug Release

Yunfeng Jiao,<sup>a</sup> Jia Guo,<sup>a</sup> Shun Shen,<sup>b</sup> Baisong Chang,<sup>a</sup> Yahong Zhang,<sup>c</sup> Xinguo Jiang<sup>b</sup> and Wuli Yang\*<sup>a</sup>

<sup>a</sup> State Key Laboratory of Molecular Engineering of Polymers and Department of Macromolecular Science, Fudan University, Shanghai, 200433, China

<sup>b</sup> Department of Pharmaceutics, School of Pharmacy, Fudan University, Shanghai, 201203, China

<sup>c</sup> Department of Chemistry, Fudan University, Shanghai, 200433, China

E-mail: [wlyang@fudan.edu.cn](mailto:wlyang@fudan.edu.cn)

This research was supported by the National Science Foundation of China (Grant No. 50403011, 20874015), the Shanghai Rising-Star Program (10QH1400200), the Innovation Program of Shanghai Municipal Education Commission (09ZZ01).

**Table S1** Preparation of HMSN with different hollow core diameters and shell thickness

| Samples <sup>[a]</sup> | Core template <sup>[b]</sup> | CTAB (g) | TEOS (mL) |
|------------------------|------------------------------|----------|-----------|
| HMSN-C70-S20           | PTBA-84                      | 0.15     | 0.32      |
| HMSN-C70-S65           | PTBA-84                      | 0.64     | 2.49      |
| HMSN-C70-S95           | PTBA-84                      | 1.03     | 4.00      |
| HMSN-C30-S40           | PTBA-36                      | 0.30     | 1.36      |
| HMSN-C110-S40          | PTBA-120                     | 0.30     | 0.65      |
| HMSN-C180-S40          | PTBA-200                     | 0.30     | 0.20      |

[a] All the samples are prepared with the same volume ammonia solution (25 wt%) of 0.85 mL.

[b] The mass of core template is 60 mg.

**Table S2** Particle size and size distribution of the PTBA core template

| Samples  | DLS           |                    |
|----------|---------------|--------------------|
|          | Diameter (nm) | PDI <sup>[a]</sup> |
| PTBA-36  | 36            | 0.16               |
| PTBA-84  | 84            | 0.12               |
| PTBA-120 | 120           | 0.10               |
| PTBA-200 | 200           | 0.02               |

[a] PDI was the polydispersity index.

**Table S3** Particle size and size distribution of the HMSN with different core sizes and shell thickness

| Samples       | DLS           |                    |
|---------------|---------------|--------------------|
|               | Diameter (nm) | PDI <sup>[a]</sup> |
| HMSN-C70-S20  | 122           | 0.08               |
| HMSN-C70-S65  | 225           | 0.06               |
| HMSN-C70-S95  | 300           | 0.07               |
| HMSN-C30-S40  | 117           | 0.07               |
| HMSN-C110-S40 | 218           | 0.05               |
| HMSN-C180-S40 | 293           | 0.06               |

[a] PDI was the polydispersity index.

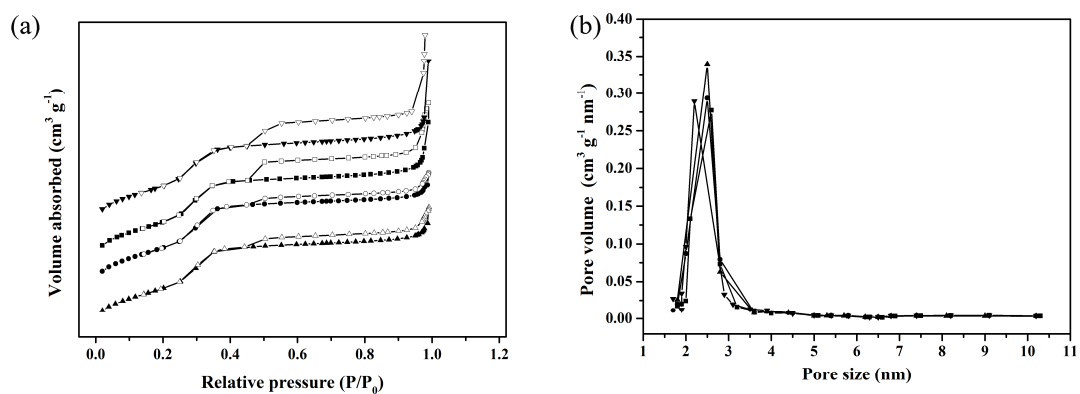

**Fig. S1** (a) Adsorption-desorption isotherm of HMSN with different shell thickness; (b) Pores size distribution of HMSN with different shell thickness obtained by BJH method. HMSN-C70-S20 (▼), HMSN-C70-S40 (■), HMSN-C70-S65 (●), HMSN-C70-S95 (▲).

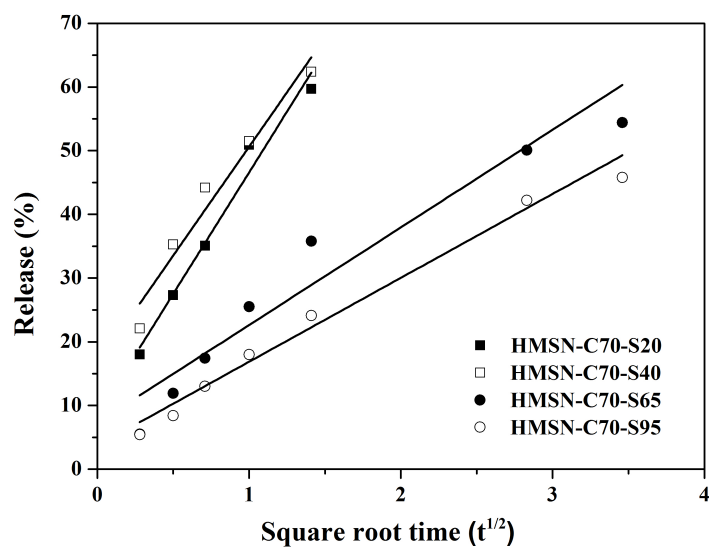

**Fig. S2** The release percentage of DOX from HMSN with different shell thickness versus the square root of time (Higuchi model) profiles at pH 5.5.

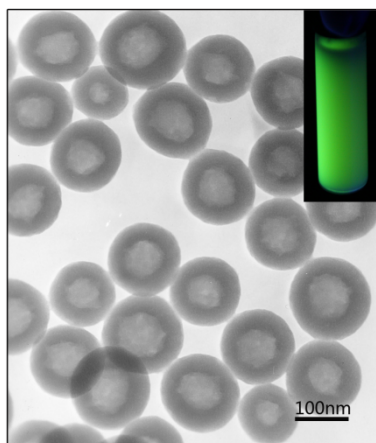

**Fig. S3** TEM image of FITC-HMSN. The inset is a photograph of FITC-HMSN under UV irradiation.
